# Supplementary material for: Relative importance of the mechanisms triggering the Eurasian ice sheet deglaciation in the GRISLI2.0 ice sheet model
Source: Copernicus journal article supplement (doi:10.5194/cp-20-187-2024), 2024-01-18
Supplement: Supplementary file 1 [file cp-20-187-2024-supplement.pdf]

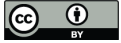

*Supplement of*

## **Relative importance of the mechanisms triggering the Eurasian ice sheet deglaciation in the GRISLI2.0 ice sheet model**

**Victor van Aalderen et al.**

*Correspondence to:* Victor van Aalderen ([victor.van-aalderen@lsce.ipsl.fr](mailto:victor.van-aalderen@lsce.ipsl.fr))

The copyright of individual parts of the supplement might differ from the article licence.

## Supplement

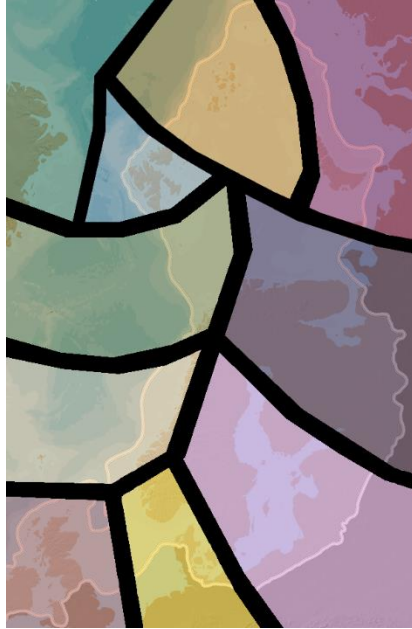

**Figure S1:** Drainage basins used for the basal melting parameterization

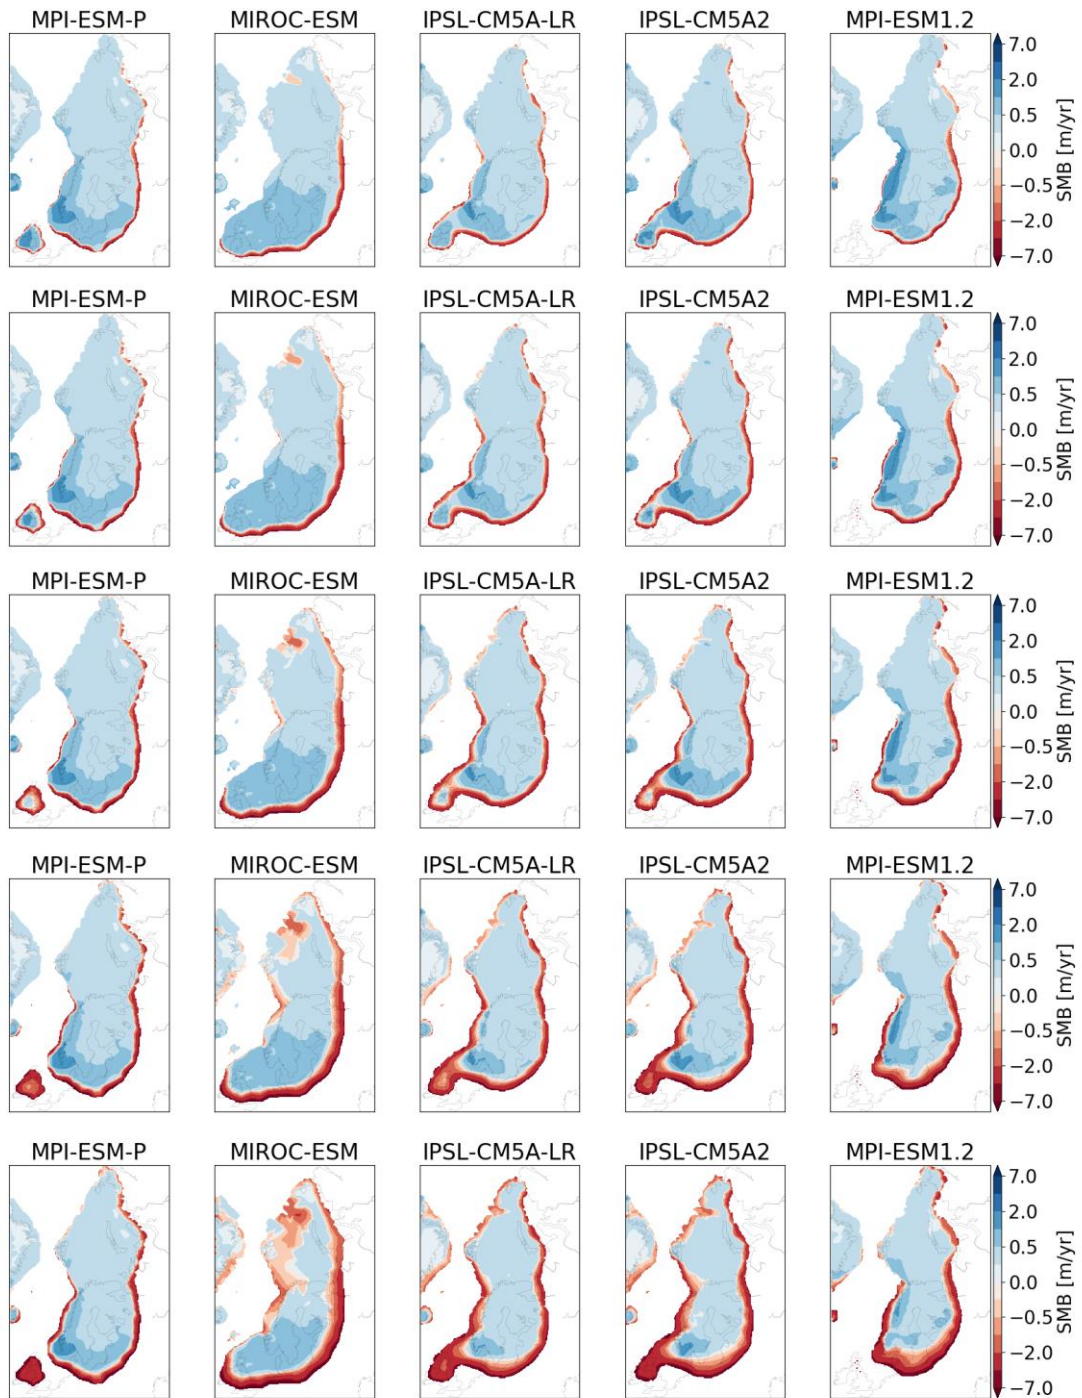

**Figure S2:** Surface mass balance calculated with each GCM forcing for 1°C (top) to 5°C (bottom) atmospheric temperature perturbations.

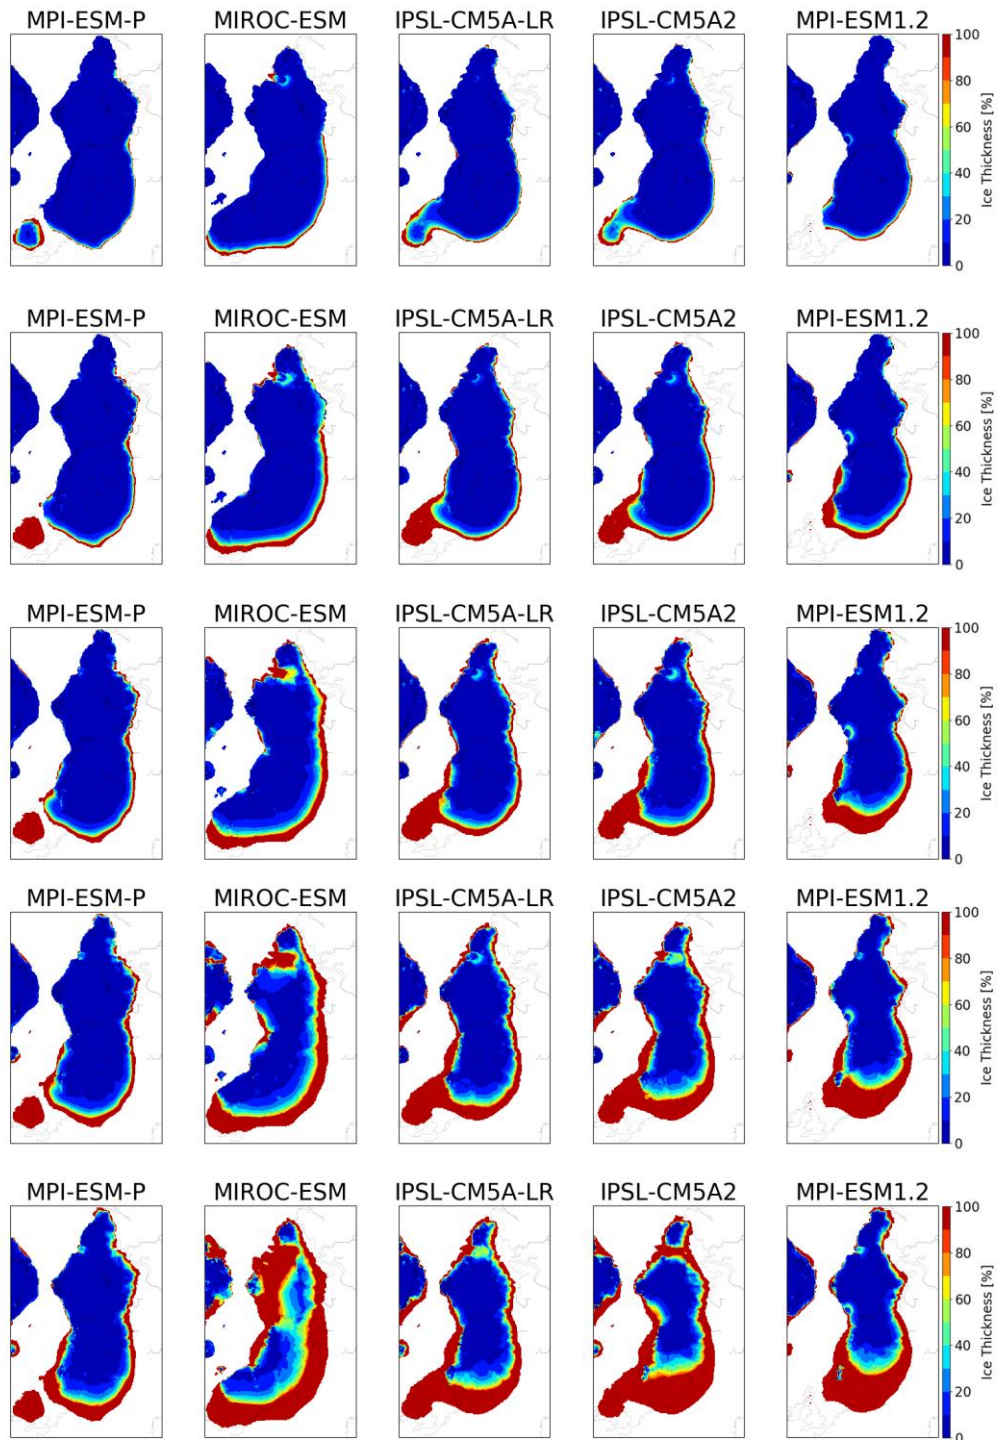

**Figure S3:** Ice thickness lost obtained in the EXP1 experiments for each GCM forcing compared to the initial LGM ice sheet for 1°C (top) to 5°C (bottom) atmospheric temperature perturbations.

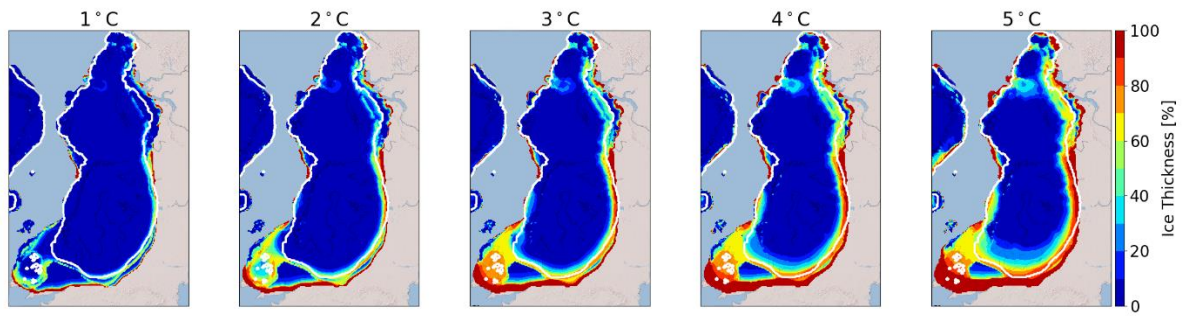

**Figure S4:** Multi-model mean of the ice thickness lost after 1000 years compared to the initial ice sheet for the EXP2 experiments. (Red: 100% lost). White line indicates the areas where the multi-model mean is done on the 5 models.

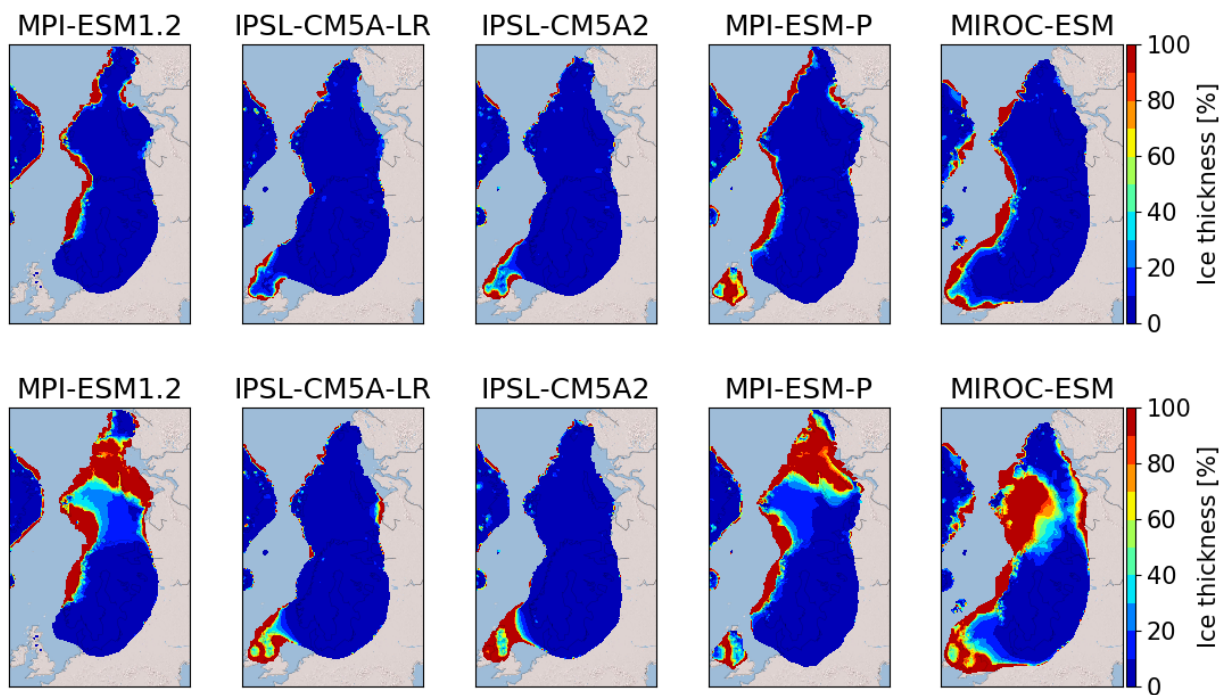

**Figure S5:** Ice thickness lost after 1000 years (top) and 10000 years (bottom) compared to the initial ice sheet for a basal melting perturbation of  $Kt = 50 \text{ m } ^\circ\text{C}^{-1} \text{ yr}^{-1}$  for each GCM forcing. (Red 100% lost).

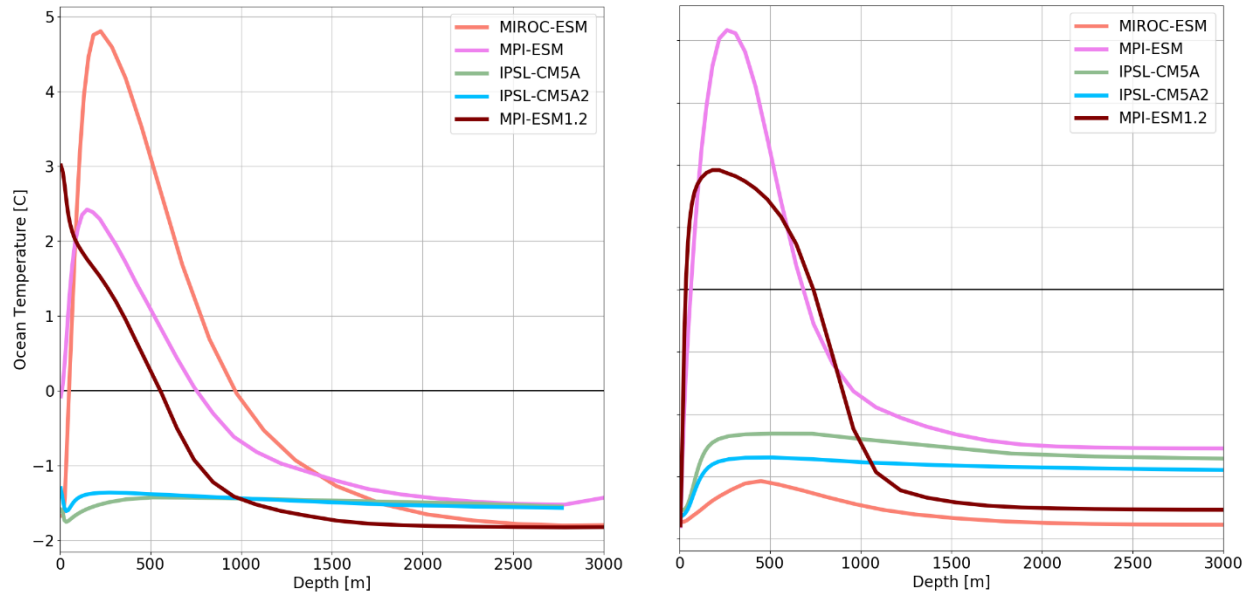

**Figure S6:** Average ocean temperature in the BJR (left) and SA sectors as a function of ocean depth.

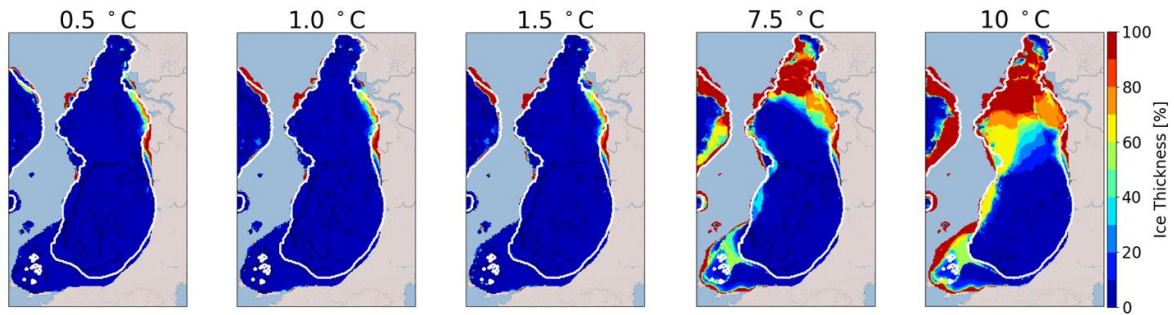

**Figure S7:** Multi-model mean of the ice thickness lost after 10000 years compared to the initial ice sheet for EXP3.2. (Red: 100% lost). For this experiment,  $K_t$  has been fixed to  $7 \text{ m } ^\circ\text{C}^{-1} \text{ yr}^{-1}$ . The white line represents the most credible extent derived from the DATED-1 compilation

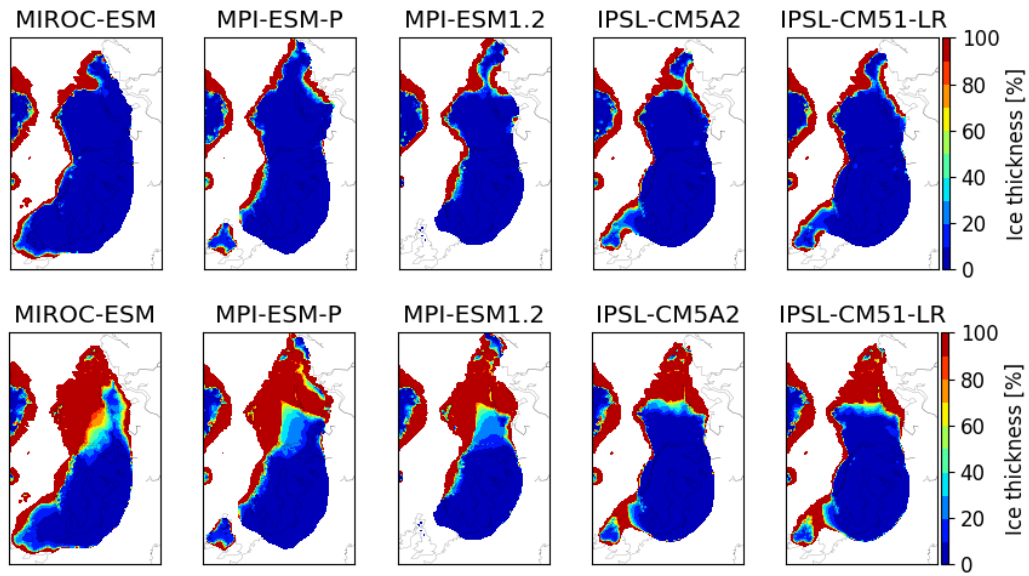

**Figure S8:** Ice thickness lost after 1000 (top) and 10000 (bottom) model years compared to the initial LGM ice sheet for an oceanic temperature perturbation of 10°C for each GCM forcing. (Red: 100% lost).

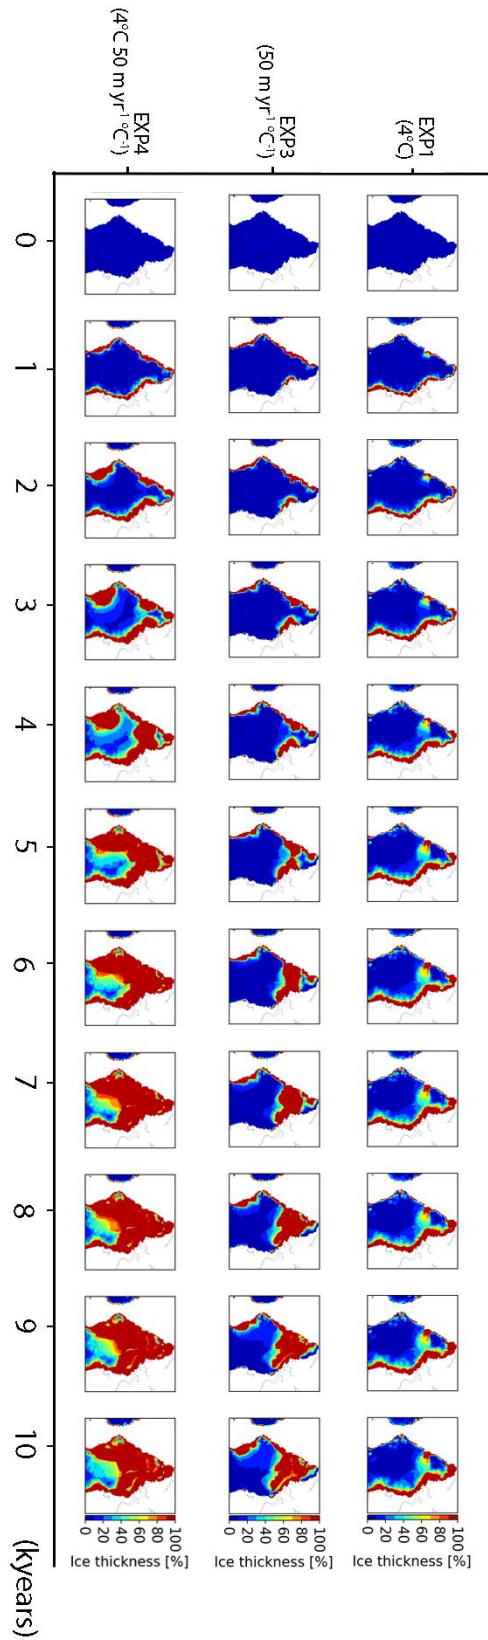

**Figure S9:** top/ Ice thickness lost for simulation forced by MPI-ESM-P from 1000 to 10000 years with respect to the ice thickness of the LGM ice-sheet in the EXP1 (4°C) experiment Middle/ same as top/ for EXP3 (50 m °C<sup>-1</sup> yr<sup>-1</sup>). Bottom/ same as top/ for EXP4 (4°C and 50 m °C<sup>-1</sup> yr<sup>-1</sup>).



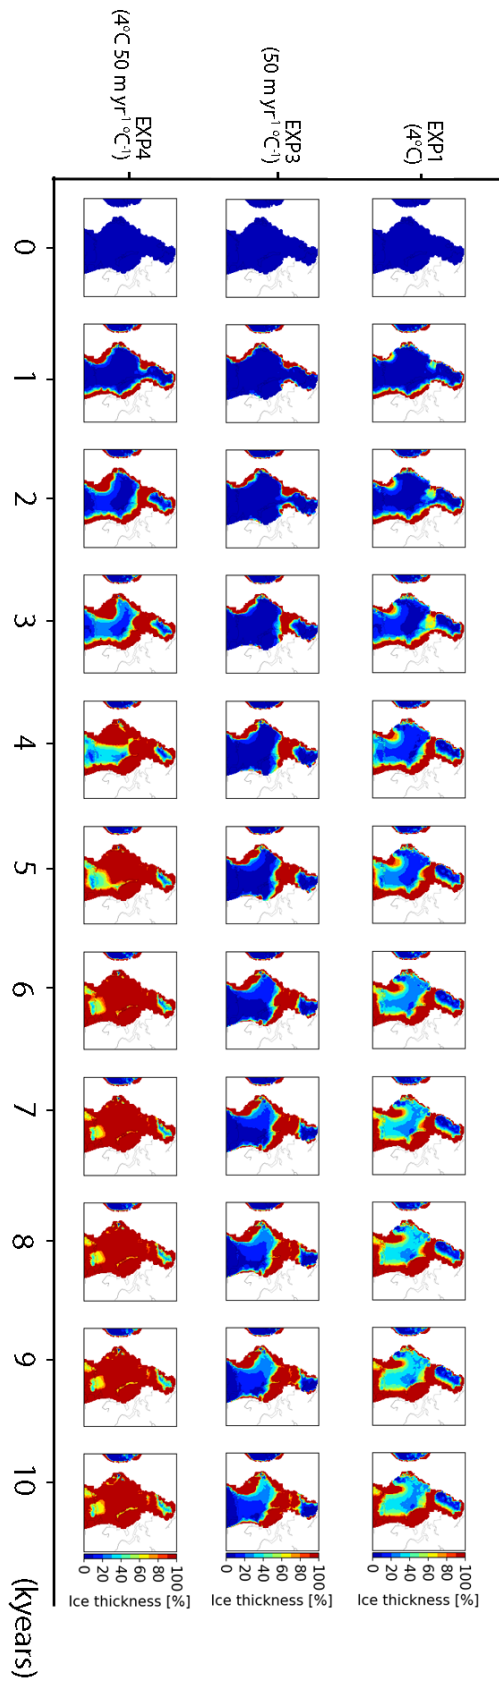

**Figure S10:** Same as Figure S9 for the simulation forced by MPI-ESM1.2

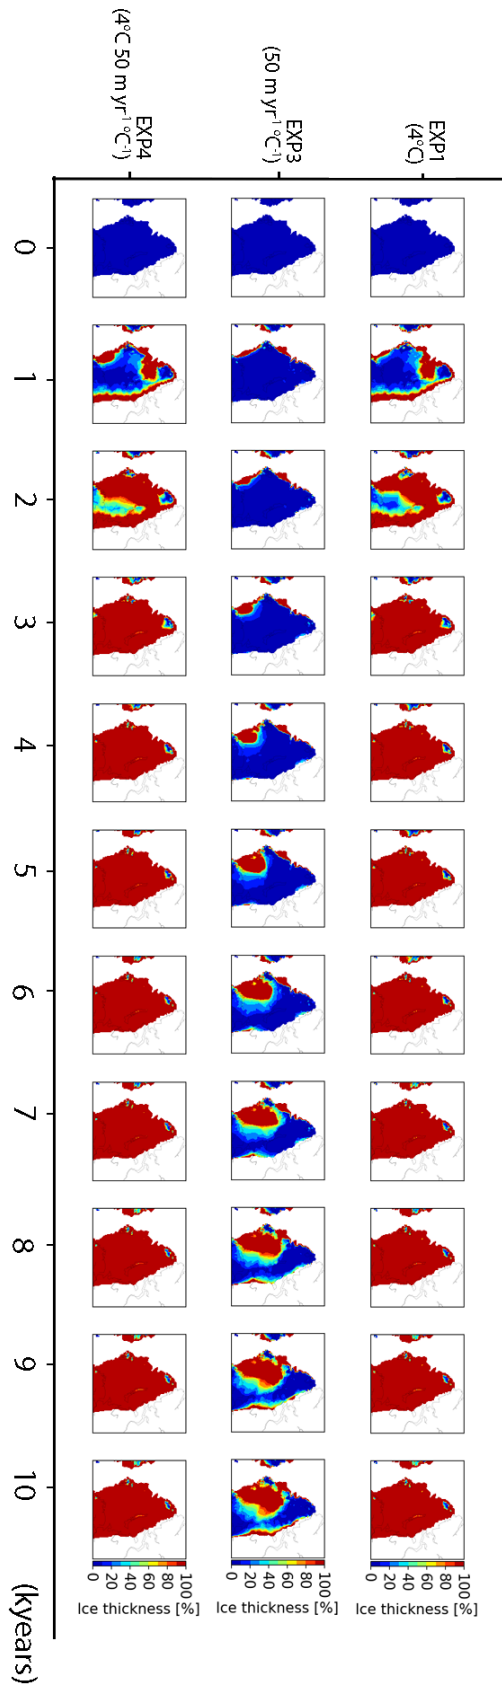

**Figure S11:** Same as Figure S9 for the simulation forced by MIROC-ESM.

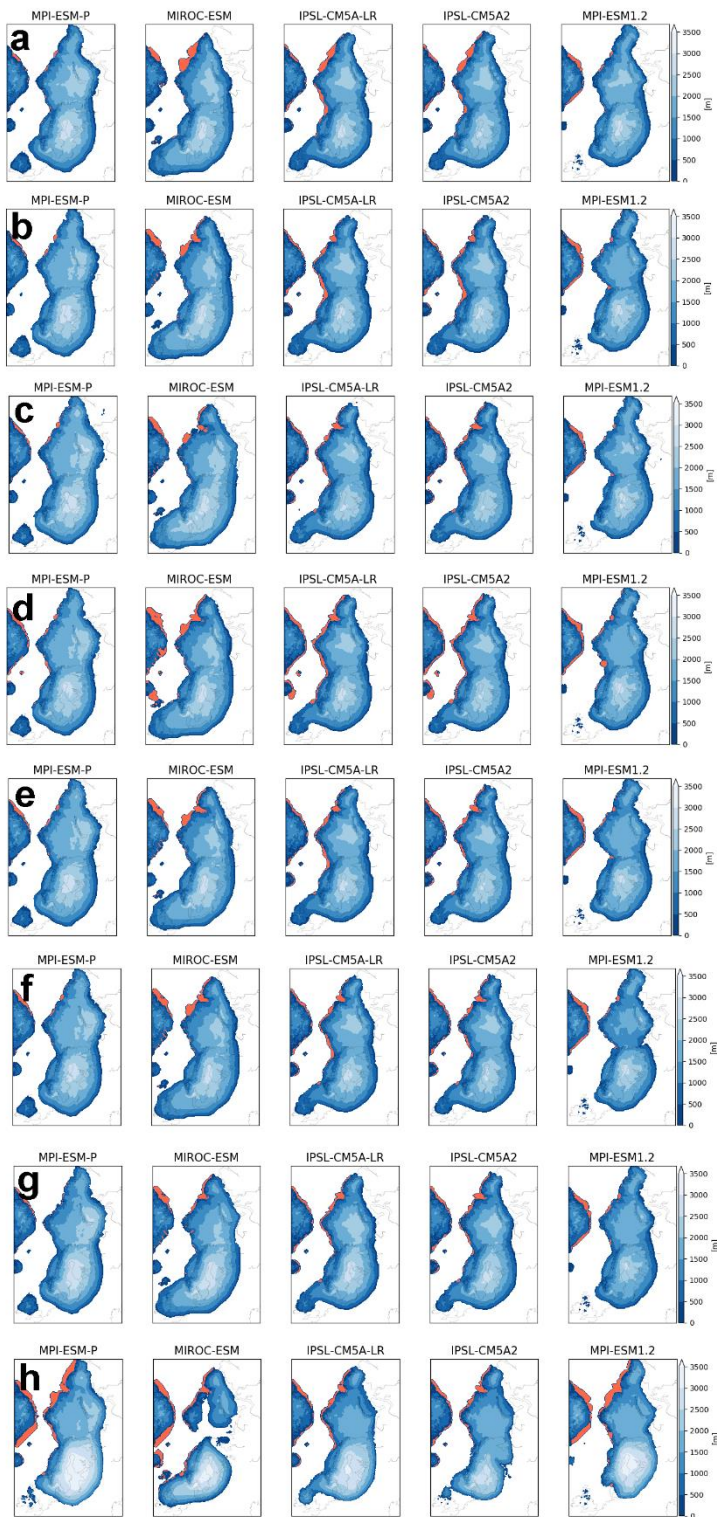

**Figure S12:** Ice thickness at the end of the spin-up experiments for the different GRISLI configurations: a/ No flux at the grounding line; b/  $\lambda = 4^\circ\text{C km}^{-1}$ ; c/  $\omega = 0.05^\circ\text{C}^{-1}$ ; d/  $H_{\text{cut}} = 50$  m; e/ PDD factors -25%; f/ PDD factor +25%; g/ Coulomb's law (plastic dragging law); h/ Transient spin-up method. The orange areas are the simulated ice shelves.

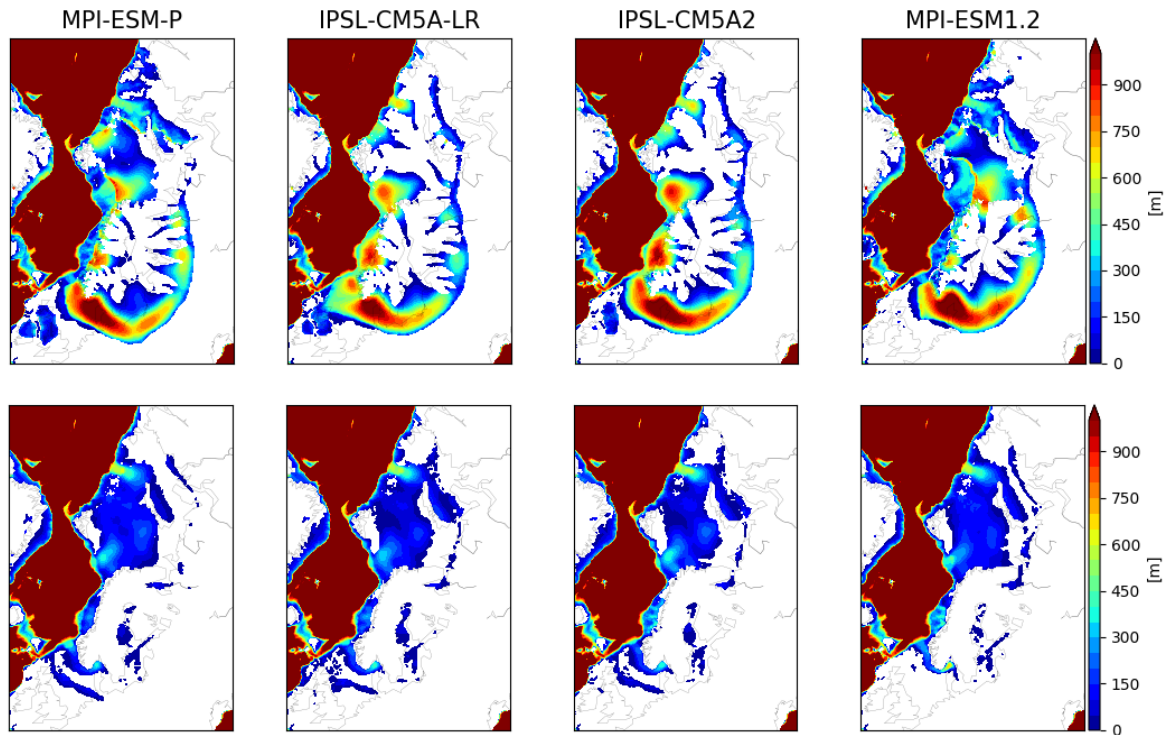

**Figure S13:** subglacial water height at the end of the spin-up for the constant LGM method (top) and the transient method (bottom).

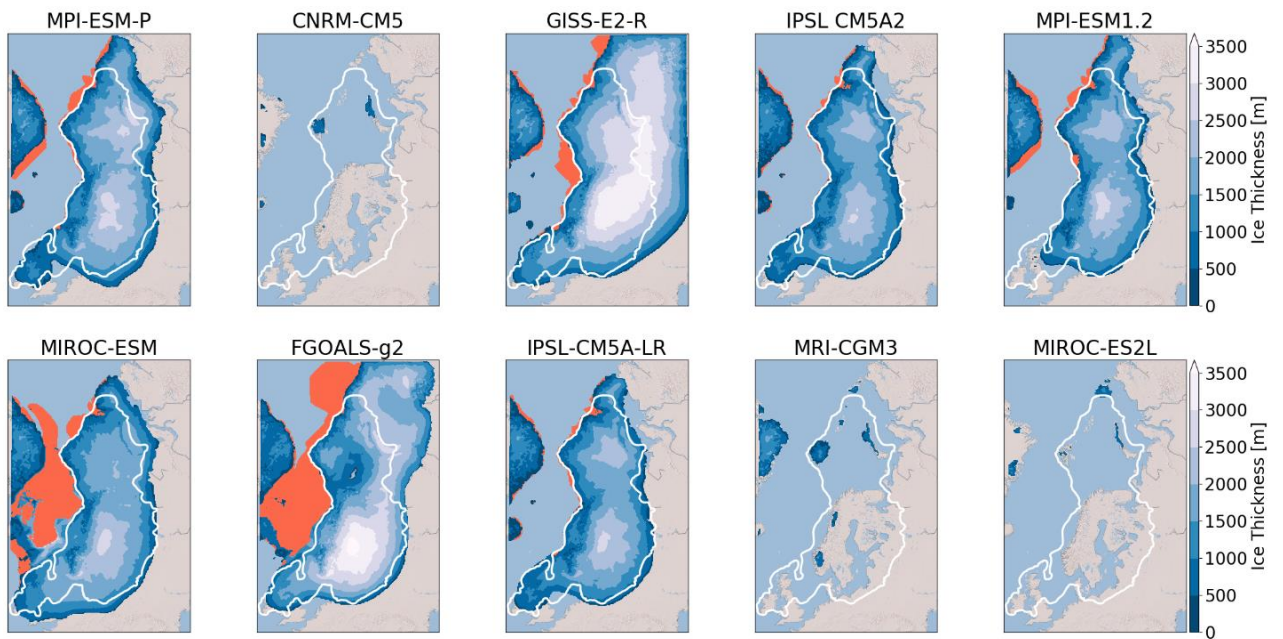

**Figure S14:** Ice thickness at the end of the 100,000-year LGM simulation (spin-up) for the different GCMs used as inputs to GRISLI. Basal melting is set to  $0.1 \text{ m yr}^{-1}$  as in Petri et al., (2020). The white line is the most credible extent derived from the DATED-1 compilation and the orange areas are the simulated ice shelves.
